# Supplementary material
Source: PubMed Central journal article supplement (PMC7688424)
Supplement: mmc2.pdf [file mmc2.pdf]

## Appendix B. Supplementary Figures and Tables

Figure B.1. Filters applied to arrive to the usable sample.

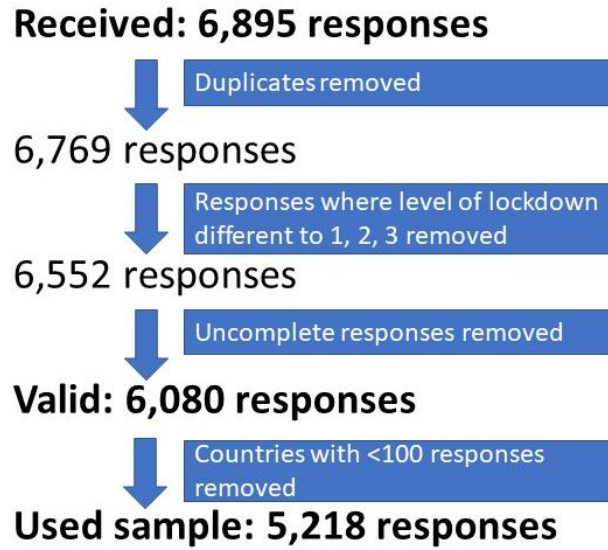

**Table B.1.** Valid responses by country. The countries used for testing the hypotheses are in bold.

| <b>Country</b>        | <b>Freq</b>  | <b>Country</b>     | <b>Freq</b> | <b>Country</b>       | <b>Freq</b> |
|-----------------------|--------------|--------------------|-------------|----------------------|-------------|
| <b>Spain</b>          | <b>3,704</b> | Philippines        | 15          | Luxembourg           | 2           |
| <b>United Kingdom</b> | <b>451</b>   | Croatia            | 12          | Nigeria              | 2           |
| <b>Germany</b>        | <b>324</b>   | Cyprus             | 12          | Serbia               | 2           |
| <b>France</b>         | <b>162</b>   | Saudi Arabia       | 11          | Singapore            | 2           |
| <b>USA</b>            | <b>157</b>   | Viet Nam           | 11          | Sri Lanka            | 2           |
| <b>Portugal</b>       | <b>152</b>   | South Africa       | 10          | Algeria              | 1           |
| <b>Italy</b>          | <b>121</b>   | Colombia           | 7           | Angola               | 1           |
| <b>New Zealand</b>    | <b>117</b>   | Indonesia          | 7           | Bangladesh           | 1           |
| <b>Mexico</b>         | <b>110</b>   | Poland             | 7           | Barbados             | 1           |
| Norway                | 75           | Uruguay            | 7           | Brunei Darussalam    | 1           |
| India                 | 54           | Romania            | 6           | Costa Rica           | 1           |
| Argentina             | 51           | Russian Federation | 5           | Ecuador              | 1           |
| Canada                | 48           | Switzerland        | 5           | Ghana                | 1           |
| Sweden                | 46           | Bulgaria           | 4           | Mauritius            | 1           |
| Belgium               | 45           | Malaysia           | 4           | North Macedonia      | 1           |
| Greece                | 44           | Malta              | 4           | Panama               | 1           |
| Ireland               | 36           | Dominican Republic | 3           | Papua Nueva Guinea   | 1           |
| Finland               | 34           | Hungary            | 3           | Paraguay             | 1           |
| Chile                 | 30           | Israel             | 3           | Qatar                | 1           |
| Australia             | 29           | Japan              | 3           | Republic of Korea    | 1           |
| Turkey                | 21           | Andorra            | 2           | Slovenia             | 1           |
| Brazil                | 20           | Iran               | 2           | Trinidad and Tobago  | 1           |
| The Netherlands       | 19           | Kenya              | 2           | Tunisia              | 1           |
| Denmark               | 18           | Latvia             | 2           | Ukraine              | 1           |
| Austria               | 16           | Lebanon            | 2           | United Arab Emirates | 1           |
| Peru                  | 15           | Lithuania          | 2           |                      |             |

**Table B.2. Socio-demographic characteristics** of the sample (5,218 obs.) and of the subsample (Spain and Level 1, 3,403 obs.)

| <b>Whole sample (n=5,218)</b>            |          |          |                                         |            |          |
|------------------------------------------|----------|----------|-----------------------------------------|------------|----------|
|                                          | <b>n</b> | <b>%</b> |                                         | <b>n</b>   | <b>%</b> |
| <b>Lockdown level</b>                    |          |          | <b>Brief Resilience Coping Scale</b>    |            |          |
| <i>Level 1</i>                           | 3544     | 67.9%    | <i>(numeric) MEAN +-SD</i>              | 14.56±2.60 |          |
| <i>Level 2</i>                           | 1147     | 22.0%    | <b>House Space (Rooms/person)</b>       |            |          |
| <i>Level 3</i>                           | 527      | 10.1%    | <i>(numeric) MEAN +-SD</i>              | 1.55±0.92  |          |
| <b>Gender</b>                            |          |          | <b>Outdoor views with natural elem.</b> |            |          |
| <i>Female</i>                            | 3403     | 65.2%    | <i>No</i>                               | 2947       | 56.5%    |
| <i>Male</i>                              | 1762     | 33.8%    | <i>Yes</i>                              | 2271       | 43.5%    |
| <i>Other</i>                             | 53       | 1.0%     | <b>Access outdoors</b>                  |            |          |
| <b>Age</b>                               |          |          | <i>No</i>                               | 1317       | 25.2%    |
| <i>18-25</i>                             | 671      | 12.9%    | <i>Yes</i>                              | 3901       | 74.8%    |
| <i>26-35</i>                             | 1197     | 22.9%    | <b>Lockdown with kids</b>               |            |          |
| <i>36-45</i>                             | 1337     | 25.6%    | <i>No</i>                               | 3389       | 64.9%    |
| <i>46-55</i>                             | 1063     | 20.4%    | <i>Yes</i>                              | 1829       | 35.1%    |
| <i>56-65</i>                             | 680      | 13.0%    | <b>Lockdown alone</b>                   |            |          |
| <i>&gt;65</i>                            | 270      | 5.2%     | <i>No</i>                               | 4582       | 87.8%    |
| <b>Maximum education achieved</b>        |          |          | <i>Yes</i>                              | 636        | 12.2%    |
| <i>Secondary education or below</i>      | 439      | 8.4%     | <b>People with Special Care Needs</b>   |            |          |
| <i>Certificate / University degree</i>   | 2368     | 45.4%    | <i>No</i>                               | 4710       | 90.3%    |
| <i>Higher (Master, PhD)</i>              | 2411     | 46.2%    | <i>Yes</i>                              | 508        | 9.7%     |
| <b>Income</b>                            |          |          | <b>Pet owner (dog)</b>                  |            |          |
| <i>Income / GDP per capita &lt;2</i>     | 2691     | 51.6%    | <i>No</i>                               | 4300       | 82.4%    |
| <i>Income / GDP per capita &gt;2</i>     | 538      | 10.3%    | <i>Yes</i>                              | 918        | 17.6%    |
| <i>No data</i>                           | 1989     | 38.1%    |                                         |            |          |
| <b>Employment changed after COVID-19</b> |          |          |                                         |            |          |
| <i>No</i>                                | 4803     | 92.0%    |                                         |            |          |
| <i>Yes</i>                               | 415      | 8.0%     |                                         |            |          |

| <b>B. Spain under lockdown Level 1 (n=3,403)</b> |          |          |                                         |            |          |
|--------------------------------------------------|----------|----------|-----------------------------------------|------------|----------|
|                                                  | <b>n</b> | <b>%</b> |                                         | <b>n</b>   | <b>%</b> |
| <b>Lockdown level</b>                            |          |          | <b>Brief Resilience Coping Scale</b>    |            |          |
| <i>Level 1</i>                                   | 3403     | 100.0%   | <i>(numeric)</i>                        | 14.41±2.63 |          |
| <i>Level 2</i>                                   | 0        | 0.0%     | <b>House Space (Rooms/person)</b>       |            |          |
| <i>Level 3</i>                                   | 0        | 0.0%     | <i>(numeric) MEAN +-SD</i>              | 1.49±0.86  |          |
| <b>Gender</b>                                    |          |          | <b>Outdoor views with natural elem.</b> |            |          |
| <i>Female</i>                                    | 2191     | 64.4%    | <i>No</i>                               | 1941       | 57.0%    |
| <i>Male</i>                                      | 1174     | 34.5%    | <i>Yes</i>                              | 1462       | 43.0%    |
| <i>Other</i>                                     | 38       | 1.1%     | <b>Access outdoors</b>                  |            |          |
| <b>Age</b>                                       |          |          | <i>No</i>                               | 1119       | 32.9%    |
| <i>18-25</i>                                     | 487      | 14.3%    | <i>Yes</i>                              | 2284       | 67.1%    |
| <i>26-35</i>                                     | 643      | 18.9%    | <b>Lockdown with kids</b>               |            |          |
| <i>36-45</i>                                     | 875      | 25.7%    | <i>No</i>                               | 2104       | 61.8%    |
| <i>46-55</i>                                     | 749      | 22.0%    | <i>Yes</i>                              | 1299       | 38.2%    |
| <i>56-65</i>                                     | 467      | 13.7%    | <b>Lockdown alone</b>                   |            |          |
| <i>&gt;65</i>                                    | 182      | 5.4%     | <i>No</i>                               | 3024       | 88.9%    |
| <b>Maximum education achieved</b>                |          |          | <i>Yes</i>                              | 379        | 11.1%    |
| <i>Secondary education or below</i>              | 331      | 9.7%     | <b>People with Special Care Needs</b>   |            |          |
| <i>Certificate / University degree</i>           | 1851     | 54.4%    | <i>No</i>                               | 3058       | 89.9%    |
| <i>Higher (Master, PhD)</i>                      | 1221     | 35.9%    | <i>Yes</i>                              | 345        | 10.1%    |
| <b>Income</b>                                    |          |          | <b>Pet owner (dog)</b>                  |            |          |
| <i>Income / GDP per capita &lt;2</i>             | 1747     | 51.4%    | <i>No</i>                               | 2836       | 83.3%    |
| <i>Income / GDP per capita &gt;2</i>             | 243      | 7.1%     | <i>Yes</i>                              | 567        | 16.7%    |
| <i>No data</i>                                   | 1413     | 41.5%    |                                         |            |          |
| <b>Employment changed after COVID-19</b>         |          |          |                                         |            |          |
| <i>No</i>                                        | 3103     | 91.2%    |                                         |            |          |
| <i>Yes</i>                                       | 300      | 8.8%     |                                         |            |          |

1 **Table B.3. Logistic Generalized Linear Models for depression and anxiety, with different**  
2 **levels of adjustment and samples:** i) Partially adjusted models, with socioeconomic variables  
3 and with lockdown characteristics (5,218 obs.); ii) Adjusted models with three different interaction  
4 terms (lockdown level vs. age, vs. lockdown with kids, vs. employment change) (5,218 obs); iii)  
5 unadjusted and adjusted models by levels of lockdown, for Level 1 (3,544 obs.) and Level 2 and 3  
6 (1,674 obs.); and iv) adjusted and unadjusted models using the whole valid sample (6,080 obs., 77  
7 countries). OR<1 indicates a decrease in the likelihood of showing depression or anxiety  
8 symptoms; OR>1 equals to an increase in symptoms. OR= Odds ratio; CI= Confident Interval;  
9 GDP= Gross Domestic Product; PHQ-2= Patient Health Questionnaire-2; GAD-2= Generalized  
10 Anxiety Disorder-2.

11  
12 **i) Partially adjusted models**  
13

| ADJUSTED WITH SOCIOECONOMIC VARIABLES   |                    |        |       |         |                 |        |       |         |
|-----------------------------------------|--------------------|--------|-------|---------|-----------------|--------|-------|---------|
|                                         | Depression (PHQ-2) |        |       |         | Anxiety (GAD-2) |        |       |         |
|                                         | OR                 | 95% CI |       | p-value | OR              | 95% CI |       | p-value |
|                                         |                    | Low    | High  |         |                 | Low    | High  |         |
| <i>(Intercept)</i>                      | 25.39              | 15.91  | 40.73 | <0.001  | 8.66            | 5.62   | 13.40 | <0.001  |
| <b>Lockdown</b>                         |                    |        |       |         |                 |        |       |         |
| <i>Level 2</i>                          | 0.85               | 0.70   | 1.02  | 0.080   | 1.09            | 0.93   | 1.29  | 0.292   |
| <i>Level 3</i>                          | 0.84               | 0.66   | 1.06  | 0.149   | 0.79            | 0.63   | 0.99  | 0.042   |
| <b>Outdoor views with natural elem.</b> |                    |        |       |         |                 |        |       |         |
| <i>Yes</i>                              | 0.77               | 0.67   | 0.89  | <0.001  | 0.84            | 0.73   | 0.95  | 0.008   |
| <b>Access outdoors</b>                  |                    |        |       |         |                 |        |       |         |
| <i>Yes</i>                              | 0.70               | 0.60   | 0.83  | <0.001  | 0.76            | 0.66   | 0.88  | <0.001  |
| <b>Gender</b>                           |                    |        |       |         |                 |        |       |         |
| <i>Male</i>                             | 0.82               | 0.71   | 0.95  | 0.011   | 0.54            | 0.47   | 0.63  | <0.001  |
| <i>Other</i>                            | 0.60               | 0.27   | 1.22  | 0.182   | 0.58            | 0.29   | 1.09  | 0.105   |
| <b>Age</b>                              |                    |        |       |         |                 |        |       |         |
| <i>26-35</i>                            | 0.48               | 0.38   | 0.60  | <0.001  | 0.57            | 0.45   | 0.70  | <0.001  |
| <i>36-45</i>                            | 0.26               | 0.20   | 0.32  | <0.001  | 0.55            | 0.45   | 0.68  | <0.001  |
| <i>46-55</i>                            | 0.19               | 0.15   | 0.24  | <0.001  | 0.40            | 0.32   | 0.49  | <0.001  |
| <i>56-65</i>                            | 0.18               | 0.14   | 0.24  | <0.001  | 0.33            | 0.26   | 0.43  | <0.001  |
| <i>&gt;65</i>                           | 0.14               | 0.09   | 0.21  | <0.001  | 0.27            | 0.19   | 0.39  | <0.001  |
| <b>Education level</b>                  |                    |        |       |         |                 |        |       |         |
| <i>Prof. Educ. / University degree</i>  | 0.84               | 0.66   | 1.08  | 0.173   | 0.85            | 0.67   | 1.07  | 0.169   |
| <i>Higher (Master, PhD)</i>             | 0.80               | 0.62   | 1.05  | 0.100   | 0.79            | 0.61   | 1.01  | 0.057   |
| <b>Income (rank)</b>                    |                    |        |       |         |                 |        |       |         |
| <i>income/GDP per capita &gt;2</i>      | 0.96               | 0.74   | 1.24  | 0.783   | 1.12            | 0.89   | 1.40  | 0.322   |
| <i>no data</i>                          | 1.05               | 0.91   | 1.22  | 0.504   | 1.10            | 0.96   | 1.26  | 0.164   |
| <b>Brief Resilience Coping Scale</b>    |                    |        |       |         |                 |        |       |         |
| <i>(numeric)</i>                        | 0.83               | 0.81   | 0.85  | <0.001  | 0.88            | 0.86   | 0.90  | <0.001  |
| <b>Pseudo R2</b>                        | 0.119              |        |       |         | 0.074           |        |       |         |

14

| ADJUSTED WITH LOCKDOWN CHARACTERISTICS  |                    |        |      |                  |                 |        |      |                  |
|-----------------------------------------|--------------------|--------|------|------------------|-----------------|--------|------|------------------|
|                                         | Depression (PHQ-2) |        |      |                  | Anxiety (GAD-2) |        |      |                  |
|                                         | OR                 | 95% CI |      | p-value          | OR              | 95% CI |      | p-value          |
|                                         |                    | Low    | High |                  |                 | Low    | High |                  |
| <i>(Intercept)</i>                      | 0.74               | 0.62   | 0.89 | <b>0.001</b>     | 0.64            | 0.54   | 0.77 | <b>&lt;0.001</b> |
| <b>Lockdown</b>                         |                    |        |      |                  |                 |        |      |                  |
| <i>Level 2</i>                          | 0.81               | 0.69   | 0.96 | <b>0.018</b>     | 1.04            | 0.89   | 1.22 | 0.591            |
| <i>Level 3</i>                          | 0.82               | 0.65   | 1.02 | 0.077            | 0.77            | 0.61   | 0.95 | <b>0.017</b>     |
| <b>Outdoor views with natural elem.</b> |                    |        |      |                  |                 |        |      |                  |
| <i>Yes</i>                              | 0.74               | 0.64   | 0.85 | <b>&lt;0.001</b> | 0.78            | 0.69   | 0.89 | <b>&lt;0.001</b> |
| <b>Access outdoors</b>                  |                    |        |      |                  |                 |        |      |                  |
| <i>Yes</i>                              | 0.72               | 0.62   | 0.83 | <b>&lt;0.001</b> | 0.75            | 0.65   | 0.87 | <b>&lt;0.001</b> |
| <b>House Space (Rooms/person)</b>       |                    |        |      |                  |                 |        |      |                  |
| <i>(numeric)</i>                        | 0.77               | 0.70   | 0.84 | <b>&lt;0.001</b> | 0.87            | 0.80   | 0.95 | <b>0.002</b>     |
| <b>Change employment</b>                |                    |        |      |                  |                 |        |      |                  |
| <i>Yes</i>                              | 1.47               | 1.18   | 1.83 | <b>0.001</b>     | 1.11            | 0.88   | 1.37 | 0.374            |
| <b>Lockdown with kids</b>               |                    |        |      |                  |                 |        |      |                  |
| <i>Yes</i>                              | 0.66               | 0.57   | 0.76 | <b>&lt;0.001</b> | 0.93            | 0.81   | 1.07 | 0.319            |
| <b>Lockdown alone</b>                   |                    |        |      |                  |                 |        |      |                  |
| <i>Yes</i>                              | 1.06               | 0.84   | 1.34 | 0.598            | 0.79            | 0.62   | 0.99 | <b>0.044</b>     |
| <b>People with Special Care Needs</b>   |                    |        |      |                  |                 |        |      |                  |
| <i>Yes</i>                              | 1.06               | 0.85   | 1.31 | 0.600            | 1.21            | 0.99   | 1.48 | 0.058            |
| <b>Pet needs walking</b>                |                    |        |      |                  |                 |        |      |                  |
| <i>Yes</i>                              | 1.43               | 1.21   | 1.68 | <b>&lt;0.001</b> | 1.35            | 1.16   | 1.58 | <b>&lt;0.001</b> |
| <b>Pseudo R2</b>                        | 0.03               |        |      |                  | 0.017           |        |      |                  |

15

16  
17

ii) Adjusted models with three different interaction terms

| ADJUSTED MODELS + INTERACTION (Lockdown vs. Age) |                    |        |       |              |                 |        |       |              |
|--------------------------------------------------|--------------------|--------|-------|--------------|-----------------|--------|-------|--------------|
|                                                  | Depression (PHQ-2) |        |       |              | Anxiety (GAD-2) |        |       |              |
|                                                  | OR                 | 95% CI |       | p-value      | OR              | 95% CI |       | p-value      |
|                                                  |                    | Low    | High  |              |                 | Low    | High  |              |
| <i>(Intercept)</i>                               | 28.02              | 17.09  | 46.20 | <0.001       | 8.74            | 5.53   | 13.85 | <0.001       |
| <b>Lockdown</b>                                  |                    |        |       |              |                 |        |       |              |
| Level 2                                          | 0.56               | 0.36   | 0.87  | <b>0.011</b> | 0.94            | 0.61   | 1.44  | 0.780        |
| Level 3                                          | 0.99               | 0.55   | 1.79  | 0.982        | 0.77            | 0.42   | 1.38  | 0.389        |
| <b>Outdoor views with natural elem.</b>          |                    |        |       |              |                 |        |       |              |
| Yes                                              | 0.77               | 0.67   | 0.89  | <b>0.001</b> | 0.82            | 0.71   | 0.93  | <b>0.003</b> |
| <b>Access outdoors</b>                           |                    |        |       |              |                 |        |       |              |
| Yes                                              | 0.71               | 0.61   | 0.84  | <0.001       | 0.75            | 0.64   | 0.87  | <0.001       |
| <b>House Space (Rooms/person)</b>                |                    |        |       |              |                 |        |       |              |
| <i>(numeric)</i>                                 | 0.91               | 0.83   | 1.01  | 0.070        | 0.98            | 0.89   | 1.07  | 0.621        |
| <b>Gender</b>                                    |                    |        |       |              |                 |        |       |              |
| Male                                             | 0.82               | 0.71   | 0.96  | <b>0.012</b> | 0.54            | 0.47   | 0.62  | <0.001       |
| Other                                            | 0.61               | 0.27   | 1.24  | 0.192        | 0.59            | 0.29   | 1.13  | 0.128        |
| <b>Age</b>                                       |                    |        |       |              |                 |        |       |              |
| 26-35                                            | 0.43               | 0.33   | 0.56  | <0.001       | 0.54            | 0.41   | 0.70  | <0.001       |
| 36-45                                            | 0.24               | 0.18   | 0.32  | <0.001       | 0.53            | 0.41   | 0.68  | <0.001       |
| 46-55                                            | 0.20               | 0.15   | 0.27  | <0.001       | 0.41            | 0.32   | 0.54  | <0.001       |
| 56-65                                            | 0.17               | 0.12   | 0.23  | <0.001       | 0.33            | 0.24   | 0.45  | <0.001       |
| >65                                              | 0.14               | 0.09   | 0.23  | <0.001       | 0.30            | 0.19   | 0.46  | <0.001       |
| <b>Education level</b>                           |                    |        |       |              |                 |        |       |              |
| Prof. Educ. / University degree                  | 0.85               | 0.66   | 1.09  | 0.190        | 0.86            | 0.68   | 1.08  | 0.192        |
| Higher (Master, PhD)                             | 0.82               | 0.63   | 1.07  | 0.146        | 0.82            | 0.64   | 1.05  | 0.110        |
| <b>Income (rank)</b>                             |                    |        |       |              |                 |        |       |              |
| income/GDP per capita >2                         | 0.98               | 0.75   | 1.27  | 0.869        | 1.08            | 0.86   | 1.36  | 0.498        |
| no data                                          | 1.04               | 0.89   | 1.20  | 0.623        | 1.08            | 0.94   | 1.24  | 0.253        |
| <b>Change employment</b>                         |                    |        |       |              |                 |        |       |              |
| Yes                                              | 1.31               | 1.03   | 1.66  | <b>0.025</b> | 1.00            | 0.79   | 1.25  | 0.972        |
| <b>Brief Resilience Coping Scale</b>             |                    |        |       |              |                 |        |       |              |
| <i>(numeric)</i>                                 | 0.83               | 0.81   | 0.85  | <0.001       | 0.88            | 0.86   | 0.90  | <0.001       |
| <b>Lockdown with kids</b>                        |                    |        |       |              |                 |        |       |              |
| Yes                                              | 0.91               | 0.76   | 1.08  | 0.274        | 1.03            | 0.88   | 1.21  | 0.677        |
| <b>Lockdown alone</b>                            |                    |        |       |              |                 |        |       |              |
| Yes                                              | 1.22               | 0.95   | 1.56  | 0.116        | 0.81            | 0.63   | 1.03  | 0.092        |
| <b>People with Special Care Needs</b>            |                    |        |       |              |                 |        |       |              |
| Yes                                              | 1.13               | 0.89   | 1.42  | 0.314        | 1.26            | 1.02   | 1.56  | <b>0.028</b> |
| <b>Pet needs walking</b>                         |                    |        |       |              |                 |        |       |              |
| Yes                                              | 1.28               | 1.07   | 1.54  | <b>0.006</b> | 1.28            | 1.08   | 1.50  | <b>0.004</b> |
| <b>Interaction term: Lockdown vs. Age</b>        |                    |        |       |              |                 |        |       |              |
| Level 2 vs 26-35                                 | 1.59               | 0.94   | 2.70  | 0.083        | 1.31            | 0.79   | 2.19  | 0.296        |
| Level 3 vs 26-35                                 | 1.00               | 0.49   | 2.01  | 0.993        | 1.17            | 0.57   | 2.40  | 0.674        |
| Level 2 vs 36-45                                 | 2.03               | 1.16   | 3.54  | <b>0.013</b> | 1.21            | 0.72   | 2.03  | 0.469        |
| Level 3 vs 36-45                                 | 0.66               | 0.29   | 1.45  | 0.308        | 1.19            | 0.57   | 2.48  | 0.642        |
| Level 2 vs 46-55                                 | 1.21               | 0.61   | 2.34  | 0.581        | 0.97            | 0.54   | 1.74  | 0.929        |
| Level 3 vs 46-55                                 | 0.37               | 0.13   | 0.96  | 0.050        | 0.65            | 0.27   | 1.50  | 0.317        |
| Level 2 vs 56-65                                 | 1.62               | 0.74   | 3.41  | 0.214        | 1.32            | 0.68   | 2.54  | 0.406        |
| Level 3 vs 56-65                                 | 1.32               | 0.52   | 3.23  | 0.547        | 1.14            | 0.45   | 2.77  | 0.784        |
| Level 2 vs >65                                   | 1.40               | 0.42   | 4.01  | 0.554        | 1.02            | 0.39   | 2.48  | 0.968        |
| Level 3 vs >65                                   | 1.10               | 0.15   | 5.00  | 0.912        | 0.86            | 0.12   | 3.79  | 0.853        |
| <b>Pseudo R2</b>                                 | <b>0.125</b>       |        |       |              | <b>0.079</b>    |        |       |              |

18  
19

| ADJUSTED MODELS + INTERACTION (Lockdown vs. Lockdown with kids) |                    |        |       |              |                 |        |       |              |
|-----------------------------------------------------------------|--------------------|--------|-------|--------------|-----------------|--------|-------|--------------|
|                                                                 | Depression (PHQ-2) |        |       |              | Anxiety (GAD-2) |        |       |              |
|                                                                 | OR                 | 95% CI |       | p-value      | OR              | 95% CI |       | p-value      |
|                                                                 |                    | Low    | High  |              |                 | Low    | High  |              |
| <i>(Intercept)</i>                                              | 26.35              | 16.21  | 43.06 | <0.001       | 8.57            | 5.47   | 13.48 | <0.001       |
| <b>Lockdown</b>                                                 |                    |        |       |              |                 |        |       |              |
| <i>Level 2</i>                                                  | 0.81               | 0.65   | 1.01  | 0.061        | 1.07            | 0.88   | 1.30  | 0.499        |
| <i>Level 3</i>                                                  | 0.85               | 0.64   | 1.12  | 0.247        | 0.74            | 0.56   | 0.97  | <b>0.033</b> |
| <b>Outdoor views with natural elem.</b>                         |                    |        |       |              |                 |        |       |              |
| <i>Yes</i>                                                      | 0.77               | 0.67   | 0.90  | <b>0.001</b> | 0.82            | 0.72   | 0.93  | <b>0.003</b> |
| <b>Access outdoors</b>                                          |                    |        |       |              |                 |        |       |              |
| <i>Yes</i>                                                      | 0.72               | 0.61   | 0.84  | <0.001       | 0.75            | 0.64   | 0.87  | <0.001       |
| <b>House Space (Rooms/person)</b>                               |                    |        |       |              |                 |        |       |              |
| <i>(numeric)</i>                                                | 0.91               | 0.82   | 1.00  | 0.060        | 0.97            | 0.89   | 1.07  | 0.563        |
| <b>Gender</b>                                                   |                    |        |       |              |                 |        |       |              |
| <i>Male</i>                                                     | 0.82               | 0.71   | 0.95  | <b>0.010</b> | 0.54            | 0.47   | 0.62  | <0.001       |
| <i>Other</i>                                                    | 0.61               | 0.28   | 1.25  | 0.199        | 0.59            | 0.29   | 1.13  | 0.125        |
| <b>Age</b>                                                      |                    |        |       |              |                 |        |       |              |
| <i>26-35</i>                                                    | 0.47               | 0.38   | 0.59  | <0.001       | 0.58            | 0.47   | 0.72  | <0.001       |
| <i>36-45</i>                                                    | 0.27               | 0.21   | 0.34  | <0.001       | 0.55            | 0.44   | 0.69  | <0.001       |
| <i>46-55</i>                                                    | 0.20               | 0.15   | 0.25  | <0.001       | 0.40            | 0.32   | 0.50  | <0.001       |
| <i>56-65</i>                                                    | 0.19               | 0.14   | 0.25  | <0.001       | 0.35            | 0.27   | 0.46  | <0.001       |
| <i>&gt;65</i>                                                   | 0.15               | 0.10   | 0.23  | <0.001       | 0.30            | 0.20   | 0.44  | <0.001       |
| <b>Education level</b>                                          |                    |        |       |              |                 |        |       |              |
| <i>Prof. Educ. / University degree</i>                          | 0.84               | 0.66   | 1.08  | 0.167        | 0.85            | 0.68   | 1.08  | 0.188        |
| <i>Higher (Master, PhD)</i>                                     | 0.82               | 0.63   | 1.07  | 0.145        | 0.81            | 0.64   | 1.05  | 0.106        |
| <b>Income (rank)</b>                                            |                    |        |       |              |                 |        |       |              |
| <i>income/GDP per capita &gt;2</i>                              | 0.97               | 0.75   | 1.26  | 0.842        | 1.08            | 0.86   | 1.35  | 0.499        |
| <i>no data</i>                                                  | 1.05               | 0.90   | 1.21  | 0.549        | 1.09            | 0.95   | 1.25  | 0.229        |
| <b>Change employment</b>                                        |                    |        |       |              |                 |        |       |              |
| <i>Yes</i>                                                      | 1.30               | 1.03   | 1.64  | <b>0.028</b> | 0.99            | 0.78   | 1.24  | 0.911        |
| <b>Brief Resilience Coping Scale</b>                            |                    |        |       |              |                 |        |       |              |
| <i>(numeric)</i>                                                | 0.83               | 0.81   | 0.85  | <0.001       | 0.88            | 0.86   | 0.90  | <0.001       |
| <b>Lockdown with kids</b>                                       |                    |        |       |              |                 |        |       |              |
| <i>Yes</i>                                                      | 0.89               | 0.73   | 1.09  | 0.259        | 1.00            | 0.83   | 1.20  | 0.994        |
| <b>Lockdown alone</b>                                           |                    |        |       |              |                 |        |       |              |
| <i>Yes</i>                                                      | 1.23               | 0.95   | 1.57  | 0.107        | 0.82            | 0.64   | 1.04  | 0.109        |
| <b>People with Special Care Needs</b>                           |                    |        |       |              |                 |        |       |              |
| <i>Yes</i>                                                      | 1.13               | 0.89   | 1.42  | 0.306        | 1.26            | 1.02   | 1.55  | <b>0.030</b> |
| <b>Pet needs walking</b>                                        |                    |        |       |              |                 |        |       |              |
| <i>Yes</i>                                                      | 1.29               | 1.08   | 1.55  | <b>0.005</b> | 1.28            | 1.08   | 1.51  | <b>0.004</b> |
| <b>Interaction term: Lockdown vs. Lockdown with kids</b>        |                    |        |       |              |                 |        |       |              |
| <i>Level 2 vs lockdown with kids</i>                            | 1.15               | 0.78   | 1.68  | 0.479        | 1.07            | 0.77   | 1.49  | 0.671        |
| <i>Level 3 vs lockdown with kids</i>                            | 0.92               | 0.53   | 1.56  | 0.756        | 1.25            | 0.77   | 2.02  | 0.362        |
| <b>Pseudo R2</b>                                                | <b>0.123</b>       |        |       |              | <b>0.078</b>    |        |       |              |

20  
21



| ADJUSTED MODELS + INTERACTION (Lockdown vs. Employment change) |                    |        |       |              |                 |        |       |              |
|----------------------------------------------------------------|--------------------|--------|-------|--------------|-----------------|--------|-------|--------------|
|                                                                | Depression (PHQ-2) |        |       |              | Anxiety (GAD-2) |        |       |              |
|                                                                | OR                 | 95% CI |       | p-value      | OR              | 95% CI |       | p-value      |
|                                                                |                    | Low    | High  |              |                 | Low    | High  |              |
| <i>(Intercept)</i>                                             | 26.09              | 16.07  | 42.57 | <0.001       | 8.50            | 5.43   | 13.35 | <0.001       |
| <b>Lockdown</b>                                                |                    |        |       |              |                 |        |       |              |
| <i>Level 2</i>                                                 | 0.82               | 0.68   | 1.00  | 0.050        | 1.08            | 0.91   | 1.28  | 0.394        |
| <i>Level 3</i>                                                 | 0.84               | 0.65   | 1.08  | 0.184        | 0.76            | 0.60   | 0.97  | <b>0.027</b> |
| <b>Outdoor views with natural elem.</b>                        |                    |        |       |              |                 |        |       |              |
| <i>Yes</i>                                                     | 0.77               | 0.67   | 0.89  | <0.001       | 0.82            | 0.71   | 0.93  | <b>0.003</b> |
| <b>Access outdoors</b>                                         |                    |        |       |              |                 |        |       |              |
| <i>Yes</i>                                                     | 0.72               | 0.61   | 0.84  | <0.001       | 0.75            | 0.64   | 0.87  | <0.001       |
| <b>House Space (Rooms/person)</b>                              |                    |        |       |              |                 |        |       |              |
| <i>(numeric)</i>                                               | 0.91               | 0.82   | 1.01  | 0.064        | 0.97            | 0.89   | 1.07  | 0.572        |
| <b>Gender</b>                                                  |                    |        |       |              |                 |        |       |              |
| <i>Male</i>                                                    | 0.82               | 0.70   | 0.95  | <b>0.010</b> | 0.54            | 0.47   | 0.62  | <0.001       |
| <i>Other</i>                                                   | 0.61               | 0.27   | 1.25  | 0.198        | 0.59            | 0.29   | 1.12  | 0.121        |
| <b>Age</b>                                                     |                    |        |       |              |                 |        |       |              |
| <i>26-35</i>                                                   | 0.48               | 0.38   | 0.59  | <0.001       | 0.58            | 0.47   | 0.72  | <0.001       |
| <i>36-45</i>                                                   | 0.27               | 0.21   | 0.34  | <0.001       | 0.55            | 0.44   | 0.69  | <0.001       |
| <i>46-55</i>                                                   | 0.20               | 0.15   | 0.25  | <0.001       | 0.40            | 0.32   | 0.50  | <0.001       |
| <i>56-65</i>                                                   | 0.19               | 0.14   | 0.25  | <0.001       | 0.35            | 0.27   | 0.45  | <0.001       |
| <i>&gt;65</i>                                                  | 0.15               | 0.10   | 0.23  | <0.001       | 0.30            | 0.20   | 0.44  | <0.001       |
| <b>Education level</b>                                         |                    |        |       |              |                 |        |       |              |
| <i>Proff. Educ. / University degree</i>                        | 0.84               | 0.66   | 1.08  | 0.179        | 0.86            | 0.68   | 1.09  | 0.208        |
| <i>Higher (Master, PhD)</i>                                    | 0.83               | 0.63   | 1.08  | 0.156        | 0.82            | 0.64   | 1.06  | 0.121        |
| <b>Income (rank)</b>                                           |                    |        |       |              |                 |        |       |              |
| <i>income/GDP per capita &gt;2</i>                             | 0.97               | 0.74   | 1.25  | 0.804        | 1.08            | 0.86   | 1.35  | 0.514        |
| <i>no data</i>                                                 | 1.05               | 0.90   | 1.21  | 0.545        | 1.09            | 0.95   | 1.25  | 0.232        |
| <b>Change employment</b>                                       |                    |        |       |              |                 |        |       |              |
| <i>Yes</i>                                                     | 1.26               | 0.96   | 1.64  | 0.095        | 0.91            | 0.70   | 1.19  | 0.496        |
| <b>Brief Resilience Coping Scale</b>                           |                    |        |       |              |                 |        |       |              |
| <i>(numeric)</i>                                               | 0.83               | 0.81   | 0.85  | <0.001       | 0.88            | 0.86   | 0.90  | <0.001       |
| <b>Lockdown with kids</b>                                      |                    |        |       |              |                 |        |       |              |
| <i>Yes</i>                                                     | 0.91               | 0.76   | 1.08  | 0.295        | 1.03            | 0.88   | 1.21  | 0.710        |
| <b>Lockdown alone</b>                                          |                    |        |       |              |                 |        |       |              |
| <i>Yes</i>                                                     | 1.22               | 0.95   | 1.57  | 0.111        | 0.82            | 0.64   | 1.04  | 0.105        |
| <b>People with Special Care Needs</b>                          |                    |        |       |              |                 |        |       |              |
| <i>Yes</i>                                                     | 1.13               | 0.89   | 1.42  | 0.314        | 1.26            | 1.02   | 1.54  | <b>0.033</b> |
| <b>Pet needs walking</b>                                       |                    |        |       |              |                 |        |       |              |
| <i>Yes</i>                                                     | 1.29               | 1.08   | 1.55  | <b>0.005</b> | 1.28            | 1.08   | 1.51  | <b>0.003</b> |
| <b>Interaction term: Lockdown vs. change employment</b>        |                    |        |       |              |                 |        |       |              |
| <i>Level 2 vs employment change</i>                            | 1.41               | 0.73   | 2.68  | 0.302        | 1.29            | 0.69   | 2.39  | 0.418        |
| <i>Level 3 vs employment change</i>                            | 0.81               | 0.32   | 1.89  | 0.641        | 1.61            | 0.71   | 3.51  | 0.236        |
| <b>Pseudo R2</b>                                               | <b>0.123</b>       |        |       |              | <b>0.078</b>    |        |       |              |

22  
23  
24  
25

26  
27

iii) Unadjusted and adjusted models by levels of lockdown

|                                         | Depression (PHQ-2) |        |       |         |              |        |       |         |
|-----------------------------------------|--------------------|--------|-------|---------|--------------|--------|-------|---------|
|                                         | Level 1            |        |       |         | Level 2+3    |        |       |         |
|                                         | OR                 | 95% CI |       | p-value | OR           | 95% CI |       | p-value |
|                                         | Low                | High   |       | Low     | High         |        |       |         |
| <b>UNADJUSTED MODELS</b>                |                    |        |       |         |              |        |       |         |
| <i>(Intercept)</i>                      | 0.51               | 0.45   | 0.58  | <0.001  | 0.36         | 0.25   | 0.51  | <0.001  |
| <b>Outdoor views with natural elem.</b> |                    |        |       |         |              |        |       |         |
| Yes                                     | 0.74               | 0.63   | 0.86  | <0.001  | 0.73         | 0.57   | 0.93  | 0.011   |
| <b>Access outdoors</b>                  |                    |        |       |         |              |        |       |         |
| Yes                                     | 0.66               | 0.56   | 0.78  | <0.001  | 0.79         | 0.55   | 1.16  | 0.220   |
| <b>Pseudo R2</b>                        | <b>0.014</b>       |        |       |         | <b>0.005</b> |        |       |         |
| <b>ADJUSTED MODELS</b>                  |                    |        |       |         |              |        |       |         |
| <i>(Intercept)</i>                      | 35.80              | 20.20  | 64.04 | <0.001  | 9.09         | 3.42   | 24.28 | <0.001  |
| <b>Outdoor views with natural elem.</b> |                    |        |       |         |              |        |       |         |
| Yes                                     | 0.77               | 0.65   | 0.91  | 0.003   | 0.78         | 0.60   | 1.01  | 0.057   |
| <b>Access outdoors</b>                  |                    |        |       |         |              |        |       |         |
| Yes                                     | 0.68               | 0.57   | 0.81  | 0.000   | 0.94         | 0.63   | 1.40  | 0.740   |
| <b>House Space (Rooms/person)</b>       |                    |        |       |         |              |        |       |         |
| <i>(numeric)</i>                        | 0.90               | 0.79   | 1.02  | 0.114   | 0.93         | 0.79   | 1.09  | 0.353   |
| <b>Gender</b>                           |                    |        |       |         |              |        |       |         |
| Male                                    | 0.87               | 0.73   | 1.04  | 0.124   | 0.73         | 0.55   | 0.97  | 0.031   |
| Other                                   | 0.37               | 0.13   | 0.90  | 0.040   | 2.34         | 0.58   | 7.92  | 0.192   |
| <b>Age</b>                              |                    |        |       |         |              |        |       |         |
| 26-35                                   | 0.42               | 0.32   | 0.56  | <0.001  | 0.59         | 0.39   | 0.88  | <0.001  |
| 36-45                                   | 0.24               | 0.18   | 0.32  | <0.001  | 0.33         | 0.21   | 0.52  | <0.001  |
| 46-55                                   | 0.20               | 0.15   | 0.27  | <0.001  | 0.15         | 0.09   | 0.26  | <0.001  |
| 56-65                                   | 0.17               | 0.12   | 0.23  | <0.001  | 0.25         | 0.14   | 0.43  | <0.001  |
| >65                                     | 0.14               | 0.08   | 0.23  | <0.001  | 0.17         | 0.06   | 0.38  | <0.001  |
| <b>Education level</b>                  |                    |        |       |         |              |        |       |         |
| Prof. Educ. / University degree         | 0.81               | 0.61   | 1.07  | 0.131   | 1.03         | 0.60   | 1.82  | 0.909   |
| Higher (Master, PhD)                    | 0.82               | 0.61   | 1.12  | 0.210   | 0.91         | 0.53   | 1.61  | 0.742   |
| <b>Income (rank)</b>                    |                    |        |       |         |              |        |       |         |
| income/GDP per capita >2                | 0.94               | 0.66   | 1.34  | 0.754   | 1.03         | 0.69   | 1.52  | 0.888   |
| no data                                 | 1.01               | 0.85   | 1.21  | 0.888   | 1.10         | 0.83   | 1.45  | 0.515   |
| <b>Change employment</b>                |                    |        |       |         |              |        |       |         |
| Yes                                     | 1.27               | 0.97   | 1.66  | 0.083   | 1.40         | 0.85   | 2.25  | 0.174   |
| <b>Brief Resilience Coping Scale</b>    |                    |        |       |         |              |        |       |         |
| <i>(numeric)</i>                        | 0.82               | 0.79   | 0.85  | <0.001  | 0.85         | 0.81   | 0.89  | <0.001  |
| <b>Lockdown with kids</b>               |                    |        |       |         |              |        |       |         |
| Yes                                     | 0.89               | 0.72   | 1.09  | 0.264   | 1.01         | 0.72   | 1.40  | 0.972   |
| <b>Lockdown alone</b>                   |                    |        |       |         |              |        |       |         |
| Yes                                     | 1.17               | 0.85   | 1.61  | 0.333   | 1.39         | 0.93   | 2.07  | 0.104   |
| <b>People with Special Care Needs</b>   |                    |        |       |         |              |        |       |         |
| Yes                                     | 0.98               | 0.74   | 1.29  | 0.873   | 1.59         | 1.03   | 2.41  | 0.033   |
| <b>Pet needs walking</b>                |                    |        |       |         |              |        |       |         |
| Yes                                     | 1.34               | 1.08   | 1.66  | 0.008   | 1.19         | 0.85   | 1.64  | 0.302   |
| <b>Pseudo R2</b>                        | <b>0.136</b>       |        |       |         | <b>0.095</b> |        |       |         |

28  
29

|                                         | Anxiety (GAD-2) |        |       |         |              |        |       |         |
|-----------------------------------------|-----------------|--------|-------|---------|--------------|--------|-------|---------|
|                                         | Level 1         |        |       |         | Level 2+3    |        |       |         |
|                                         | OR              | 95% CI |       | p-value | OR           | 95% CI |       | p-value |
|                                         | Low             | High   |       | Low     | High         |        |       |         |
| <b>UNADJUSTED MODELS</b>                |                 |        |       |         |              |        |       |         |
| <i>(Intercept)</i>                      | 0.54            | 0.48   | 0.62  | <0.001  | 0.46         | 0.33   | 0.63  | <0.001  |
| <b>Outdoor views with natural elem.</b> |                 |        |       |         |              |        |       |         |
| Yes                                     | 0.76            | 0.65   | 0.89  | <0.001  | 0.90         | 0.72   | 1.13  | 0.364   |
| <b>Access outdoors</b>                  |                 |        |       |         |              |        |       |         |
| Yes                                     | 0.75            | 0.64   | 0.88  | <0.001  | 0.79         | 0.56   | 1.12  | 0.170   |
| <b>Pseudo R2</b>                        | <b>0.009</b>    |        |       |         | <b>0.002</b> |        |       |         |
| <b>ADJUSTED MODELS</b>                  |                 |        |       |         |              |        |       |         |
| <i>(Intercept)</i>                      | 8.63            | 5.10   | 14.66 | <0.001  | 7.41         | 2.98   | 18.53 | <0.001  |
| <b>Outdoor views with natural elem.</b> |                 |        |       |         |              |        |       |         |
| Yes                                     | 0.77            | 0.66   | 0.90  | 0.002   | 0.93         | 0.73   | 1.18  | 0.544   |
| <b>Access outdoors</b>                  |                 |        |       |         |              |        |       |         |
| Yes                                     | 0.76            | 0.64   | 0.90  | 0.001   | 0.75         | 0.52   | 1.09  | 0.130   |
| <b>House Space (Rooms/person)</b>       |                 |        |       |         |              |        |       |         |
| <i>(numeric)</i>                        | 0.94            | 0.84   | 1.06  | 0.350   | 1.03         | 0.88   | 1.19  | 0.719   |
| <b>Gender</b>                           |                 |        |       |         |              |        |       |         |
| <i>Male</i>                             | 0.55            | 0.47   | 0.66  | <0.001  | 0.50         | 0.38   | 0.65  | <0.001  |
| <i>Other</i>                            | 0.53            | 0.23   | 1.10  | 0.104   | 0.96         | 0.21   | 3.31  | 0.957   |
| <b>Age</b>                              |                 |        |       |         |              |        |       |         |
| <i>26-35</i>                            | 0.55            | 0.42   | 0.72  | <0.001  | 0.62         | 0.41   | 0.92  | 0.017   |
| <i>36-45</i>                            | 0.57            | 0.44   | 0.74  | <0.001  | 0.52         | 0.34   | 0.80  | 0.003   |
| <i>46-55</i>                            | 0.44            | 0.34   | 0.57  | <0.001  | 0.29         | 0.18   | 0.47  | <0.001  |
| <i>56-65</i>                            | 0.35            | 0.26   | 0.47  | <0.001  | 0.36         | 0.22   | 0.59  | <0.001  |
| <i>&gt;65</i>                           | 0.31            | 0.20   | 0.48  | <0.001  | 0.27         | 0.12   | 0.55  | 0.001   |
| <b>Education level</b>                  |                 |        |       |         |              |        |       |         |
| <i>Prof. Educ. / University degree</i>  | 0.85            | 0.65   | 1.11  | 0.230   | 0.93         | 0.56   | 1.58  | 0.791   |
| <i>Higher (Master, PhD)</i>             | 0.79            | 0.59   | 1.06  | 0.113   | 1.01         | 0.61   | 1.71  | 0.964   |
| <b>Income (rank)</b>                    |                 |        |       |         |              |        |       |         |
| <i>income/GDP per capita &gt;2</i>      | 0.82            | 0.59   | 1.13  | 0.230   | 1.42         | 1.02   | 1.97  | 0.038   |
| <i>no data</i>                          | 1.11            | 0.94   | 1.30  | 0.224   | 0.98         | 0.76   | 1.28  | 0.898   |
| <b>Change employment</b>                |                 |        |       |         |              |        |       |         |
| Yes                                     | 0.91            | 0.70   | 1.19  | 0.509   | 1.21         | 0.76   | 1.90  | 0.421   |
| <b>Brief Resilience Coping Scale</b>    |                 |        |       |         |              |        |       |         |
| <i>(numeric)</i>                        | 0.88            | 0.86   | 0.91  | <0.001  | 0.86         | 0.83   | 0.91  | <0.001  |
| <b>Lockdown with kids</b>               |                 |        |       |         |              |        |       |         |
| Yes                                     | 0.97            | 0.80   | 1.17  | 0.725   | 1.23         | 0.91   | 1.65  | 0.173   |
| <b>Lockdown alone</b>                   |                 |        |       |         |              |        |       |         |
| Yes                                     | 0.77            | 0.56   | 1.05  | 0.099   | 0.91         | 0.61   | 1.33  | 0.622   |
| <b>People with Special Care Needs</b>   |                 |        |       |         |              |        |       |         |
| Yes                                     | 1.11            | 0.86   | 1.42  | 0.417   | 1.73         | 1.17   | 2.52  | 0.005   |
| <b>Pet needs walking</b>                |                 |        |       |         |              |        |       |         |
| Yes                                     | 1.28            | 1.05   | 1.57  | 0.016   | 1.20         | 0.89   | 1.60  | 0.222   |
| <b>Pseudo R2</b>                        | <b>0.083</b>    |        |       |         | <b>0.075</b> |        |       |         |

30  
31

32  
33

iv) adjusted and unadjusted models using the whole valid sample

|                                         | Depression (PHQ-2) |        |       |              | Anxiety (GAD-2) |        |       |              |
|-----------------------------------------|--------------------|--------|-------|--------------|-----------------|--------|-------|--------------|
|                                         | OR                 | 95% CI |       | p-value      | OR              | 95% CI |       | p-value      |
|                                         |                    | Low    | High  |              |                 | Low    | High  |              |
| <b>UNADJUSTED MODELS</b>                |                    |        |       |              |                 |        |       |              |
| <i>(Intercept)</i>                      | 0.50               | 0.44   | 0.56  | <0.001       | 0.54            | 0.48   | 0.60  | <0.001       |
| <b>Lockdown</b>                         |                    |        |       |              |                 |        |       |              |
| <i>Level 2</i>                          | 0.78               | 0.67   | 0.91  | <b>0.002</b> | 0.97            | 0.84   | 1.11  | 0.633        |
| <i>Level 3</i>                          | 0.81               | 0.68   | 0.98  | <b>0.031</b> | 0.81            | 0.68   | 0.97  | <b>0.020</b> |
| <b>Outdoor views with natural elem.</b> |                    |        |       |              |                 |        |       |              |
| <i>Yes</i>                              | 0.73               | 0.65   | 0.83  | <0.001       | 0.80            | 0.71   | 0.90  | <0.001       |
| <b>Access outdoors</b>                  |                    |        |       |              |                 |        |       |              |
| <i>Yes</i>                              | 0.68               | 0.59   | 0.78  | <0.001       | 0.75            | 0.65   | 0.86  | <0.001       |
| <b>Pseudo R2</b>                        | <b>0.015</b>       |        |       |              | <b>0.008</b>    |        |       |              |
| <b>ADJUSTED MODELS</b>                  |                    |        |       |              |                 |        |       |              |
| <i>(Intercept)</i>                      | 24.31              | 15.45  | 38.40 | <0.001       | 7.45            | 4.90   | 11.35 | <0.001       |
| <b>Lockdown</b>                         |                    |        |       |              |                 |        |       |              |
| <i>Level 2</i>                          | 0.83               | 0.70   | 0.98  | <b>0.032</b> | 1.04            | 0.89   | 1.21  | 0.647        |
| <i>Level 3</i>                          | 0.85               | 0.69   | 1.04  | 0.112        | 0.86            | 0.71   | 1.04  | 0.116        |
| <b>Outdoor views with natural elem.</b> |                    |        |       |              |                 |        |       |              |
| <i>Yes</i>                              | 0.77               | 0.68   | 0.89  | <0.001       | 0.83            | 0.73   | 0.94  | <b>0.003</b> |
| <b>Access outdoors</b>                  |                    |        |       |              |                 |        |       |              |
| <i>Yes</i>                              | 0.72               | 0.61   | 0.83  | <0.001       | 0.75            | 0.65   | 0.87  | <b>0.000</b> |
| <b>House Space (Rooms/person)</b>       |                    |        |       |              |                 |        |       |              |
| <i>(numeric)</i>                        | 0.91               | 0.83   | 1.00  | <b>0.047</b> | 1.01            | 0.93   | 1.10  | 0.827        |
| <b>Gender</b>                           |                    |        |       |              |                 |        |       |              |
| <i>Male</i>                             | 0.81               | 0.70   | 0.93  | <b>0.004</b> | 0.55            | 0.48   | 0.63  | <0.001       |
| <i>Other</i>                            | 0.64               | 0.30   | 1.26  | 0.219        | 0.73            | 0.38   | 1.31  | 0.304        |
| <b>Age</b>                              |                    |        |       |              |                 |        |       |              |
| <i>26-35</i>                            | 0.48               | 0.39   | 0.59  | <0.001       | 0.64            | 0.52   | 0.78  | <0.001       |
| <i>36-45</i>                            | 0.28               | 0.22   | 0.35  | <0.001       | 0.55            | 0.45   | 0.68  | <0.001       |
| <i>46-55</i>                            | 0.20               | 0.16   | 0.25  | <0.001       | 0.41            | 0.33   | 0.51  | <0.001       |
| <i>56-65</i>                            | 0.19               | 0.14   | 0.24  | <0.001       | 0.35            | 0.27   | 0.44  | <0.001       |
| <i>&gt;65</i>                           | 0.16               | 0.11   | 0.24  | <0.001       | 0.28            | 0.19   | 0.40  | <0.001       |
| <b>Education level</b>                  |                    |        |       |              |                 |        |       |              |
| <i>Prof. Educ. / University degree</i>  | 0.85               | 0.67   | 1.08  | 0.172        | 0.86            | 0.69   | 1.08  | 0.193        |
| <i>Higher (Master, PhD)</i>             | 0.83               | 0.64   | 1.07  | 0.142        | 0.81            | 0.64   | 1.04  | 0.091        |
| <b>Income (rank)</b>                    |                    |        |       |              |                 |        |       |              |
| <i>income/GDP per capita &gt;2</i>      | 0.89               | 0.72   | 1.10  | 0.286        | 1.03            | 0.85   | 1.24  | 0.769        |
| <i>no data</i>                          | 1.04               | 0.90   | 1.19  | 0.611        | 1.08            | 0.95   | 1.24  | 0.220        |
| <b>Change employment</b>                |                    |        |       |              |                 |        |       |              |
| <i>Yes</i>                              | 1.36               | 1.09   | 1.69  | <b>0.006</b> | 0.99            | 0.80   | 1.23  | 0.953        |
| <b>Brief Resilience Coping Scale</b>    |                    |        |       |              |                 |        |       |              |
| <i>(numeric)</i>                        | 0.83               | 0.81   | 0.85  | <0.001       | 0.88            | 0.86   | 0.90  | <0.001       |
| <b>Lockdown with kids</b>               |                    |        |       |              |                 |        |       |              |
| <i>Yes</i>                              | 0.89               | 0.76   | 1.05  | 0.175        | 1.01            | 0.87   | 1.17  | 0.922        |
| <b>Lockdown alone</b>                   |                    |        |       |              |                 |        |       |              |
| <i>Yes</i>                              | 1.20               | 0.96   | 1.51  | 0.110        | 0.82            | 0.66   | 1.02  | 0.079        |
| <b>People with Special Care Needs</b>   |                    |        |       |              |                 |        |       |              |
| <i>Yes</i>                              | 1.18               | 0.95   | 1.45  | 0.135        | 1.31            | 1.08   | 1.58  | <b>0.006</b> |
| <b>Pet needs walking</b>                |                    |        |       |              |                 |        |       |              |
| <i>Yes</i>                              | <b>1.25</b>        | 1.06   | 1.48  | <b>0.009</b> | 1.24            | 1.07   | 1.45  | <b>0.005</b> |
| <b>Pseudo R2</b>                        | <b>0.119</b>       |        |       |              | <b>0.074</b>    |        |       |              |

34  
35

36 **Table B.4: Adjusted and unadjusted logistic Generalized Linear Models for depression and anxiety, as**  
 37 **a function of outdoor views and accessible outdoor areas.** Models were built with the subsample of Spain  
 38 under Level 1 lockdown (n=3,403). OR<1, decrease in the likelihood of showing depression or anxiety  
 39 symptoms; OR>1 increase in likelihood of showing depression or anxiety symptoms. Key: OR= Odds ratio,  
 40 CI= Confident Interval.

|                                                          | Depression (PHQ-2) |        |       |              | Anxiety (GAD-2) |        |       |              |
|----------------------------------------------------------|--------------------|--------|-------|--------------|-----------------|--------|-------|--------------|
|                                                          | OR                 | 95% CI |       | p-value      | OR              | 95% CI |       | p-value      |
|                                                          | Low                | High   |       | Low          | High            |        |       |              |
| <b>UNADJUSTED MODELS</b>                                 |                    |        |       |              |                 |        |       |              |
| <i>(Intercept)</i>                                       | 0.51               | 0.45   | 0.59  | <0.001       | 0.55            | 0.48   | 0.63  | <0.001       |
| <b>Outdoor views</b>                                     |                    |        |       |              |                 |        |       |              |
| <i>Mixed</i>                                             | 0.71               | 0.60   | 0.85  | <0.001       | 0.73            | 0.61   | 0.86  | <0.001       |
| <i>Nature</i>                                            | 0.67               | 0.49   | 0.90  | <b>0.009</b> | 0.83            | 0.63   | 1.08  | 0.175        |
| <b>Accessible outdoor areas</b>                          |                    |        |       |              |                 |        |       |              |
| <i>Balcony</i>                                           | 0.66               | 0.55   | 0.80  | <0.001       | 0.74            | 0.62   | 0.88  | <b>0.001</b> |
| <i>Other private</i>                                     | 0.70               | 0.55   | 0.88  | <b>0.003</b> | 0.70            | 0.56   | 0.88  | <b>0.002</b> |
| <i>Shared or public</i>                                  | 0.59               | 0.43   | 0.80  | <0.001       | 0.87            | 0.65   | 1.15  | 0.320        |
| <i>Observations</i>                                      | 3403               |        |       |              | 3403            |        |       |              |
| <i>Pseudo-R2</i>                                         | 0.016              |        |       |              | 0.010           |        |       |              |
| <b>ADJUSTED MODELS</b>                                   |                    |        |       |              |                 |        |       |              |
| <i>(Intercept)</i>                                       | 37.07              | 20.64  | 67.21 | <0.001       | 8.76            | 5.12   | 15.07 | <b>0.000</b> |
| <b>Outdoor views</b>                                     |                    |        |       |              |                 |        |       |              |
| <i>Mixed</i>                                             | 0.74               | 0.61   | 0.89  | <b>0.002</b> | 0.74            | 0.62   | 0.88  | <b>0.001</b> |
| <i>Nature</i>                                            | 0.75               | 0.54   | 1.04  | 0.085        | 0.85            | 0.64   | 1.13  | 0.278        |
| <b>Accessible outdoor areas</b>                          |                    |        |       |              |                 |        |       |              |
| <i>Balcony</i>                                           | 0.70               | 0.57   | 0.85  | <0.001       | 0.76            | 0.63   | 0.92  | <b>0.004</b> |
| <i>Other private</i>                                     | 0.67               | 0.51   | 0.87  | <b>0.003</b> | 0.68            | 0.53   | 0.87  | <b>0.002</b> |
| <i>Shared or public</i>                                  | 0.60               | 0.42   | 0.84  | <b>0.003</b> | 0.92            | 0.68   | 1.23  | 0.561        |
| <b>House Space (Rooms/person)</b><br><i>(numeric)</i>    | 0.90               | 0.78   | 1.03  | 0.111        | 0.93            | 0.82   | 1.06  | 0.261        |
| <b>Gender</b>                                            |                    |        |       |              |                 |        |       |              |
| <i>Male</i>                                              | 0.88               | 0.73   | 1.05  | 0.161        | 0.54            | 0.45   | 0.64  | <0.001       |
| <i>Other</i>                                             | 0.30               | 0.10   | 0.76  | <b>0.019</b> | 0.56            | 0.24   | 1.18  | 0.141        |
| <b>Age</b>                                               |                    |        |       |              |                 |        |       |              |
| <i>26-35</i>                                             | 0.41               | 0.31   | 0.55  | <0.001       | 0.52            | 0.40   | 0.69  | <0.001       |
| <i>36-45</i>                                             | 0.23               | 0.17   | 0.31  | <0.001       | 0.54            | 0.42   | 0.71  | <0.001       |
| <i>46-55</i>                                             | 0.20               | 0.15   | 0.26  | <0.001       | 0.42            | 0.32   | 0.55  | <0.001       |
| <i>56-65</i>                                             | 0.17               | 0.12   | 0.24  | <0.001       | 0.35            | 0.25   | 0.47  | <0.001       |
| <i>&gt;65</i>                                            | 0.13               | 0.08   | 0.21  | <0.001       | 0.30            | 0.19   | 0.46  | <0.001       |
| <b>Education level</b>                                   |                    |        |       |              |                 |        |       |              |
| <i>Proff. Educ. / University degree</i>                  | 0.84               | 0.63   | 1.11  | 0.217        | 0.86            | 0.66   | 1.13  | 0.287        |
| <i>Higher (Master, PhD)</i>                              | 0.83               | 0.61   | 1.15  | 0.262        | 0.81            | 0.60   | 1.08  | 0.152        |
| <b>Income (rank)</b>                                     |                    |        |       |              |                 |        |       |              |
| <i>income/GDP per capita &gt;2</i>                       | 0.92               | 0.62   | 1.34  | 0.674        | 0.77            | 0.54   | 1.09  | 0.154        |
| <i>no data</i>                                           | 1.04               | 0.87   | 1.24  | 0.705        | 1.13            | 0.96   | 1.33  | 0.149        |
| <b>Change employment</b>                                 |                    |        |       |              |                 |        |       |              |
| <i>Yes</i>                                               | 1.18               | 0.89   | 1.56  | 0.250        | 0.89            | 0.67   | 1.16  | 0.392        |
| <b>Brief Resilience Coping Scale</b><br><i>(numeric)</i> | 0.82               | 0.79   | 0.85  | <0.001       | 0.89            | 0.86   | 0.91  | <0.001       |
| <b>Lockdown with kids</b>                                |                    |        |       |              |                 |        |       |              |
| <i>Yes</i>                                               | 0.93               | 0.75   | 1.15  | 0.516        | 0.98            | 0.80   | 1.19  | 0.828        |
| <b>Lockdown alone</b>                                    |                    |        |       |              |                 |        |       |              |
| <i>Yes</i>                                               | 1.20               | 0.86   | 1.67  | 0.276        | 0.73            | 0.52   | 1.01  | 0.061        |
| <b>People with Special Care Needs</b>                    |                    |        |       |              |                 |        |       |              |
| <i>Yes</i>                                               | 0.98               | 0.73   | 1.30  | 0.888        | 1.12            | 0.86   | 1.44  | 0.388        |
| <b>Pet needs walking</b>                                 |                    |        |       |              |                 |        |       |              |
| <i>Yes</i>                                               | 1.35               | 1.08   | 1.69  | <b>0.008</b> | 1.23            | 0.99   | 1.51  | 0.060        |
| <i>Observations</i>                                      | 3403               |        |       |              | 3403            |        |       |              |
| <i>Pseudo-R2</i>                                         | 0.141              |        |       |              | 0.088           |        |       |              |

41 **Table B.5: Self-reported contribution of views and accessible outdoor spaces to cope with**  
 42 **lockdown situation.** Using the subsample of people in Spain and in Level 1 (3,393 obs.), self-  
 43 reported contribution was captured through Likert-scale scores (from 0 “not at all” to 5 “very much”).  
 44 Different lettering (A,B,C) indicates significant differences for the Tukey’s *post hoc* test.

|                                  | n    | Mean | SD   | ANOVA |         | Tukey’s<br>post<br>hoc |
|----------------------------------|------|------|------|-------|---------|------------------------|
|                                  |      |      |      | F     | p-value |                        |
| <b>Views</b>                     |      |      |      |       |         |                        |
| Limited or urban                 | 1941 | 2.98 | 1.28 |       |         | A                      |
| Mixed                            | 1109 | 4.09 | 1.01 | 533.5 | <0.001  | B                      |
| Natural                          | 353  | 4.67 | 0.67 |       |         | C                      |
| <b>Accessible outdoor spaces</b> |      |      |      |       |         |                        |
| Only balcony                     | 1299 | 4.15 | 1.02 |       |         | A                      |
| Garden/patio                     | 665  | 4.50 | 0.94 | 25.96 | <0.001  | B                      |
| Shared and/or public spaces      | 320  | 4.27 | 1.14 |       |         | A                      |
| <i>None</i> <sup>1</sup>         | 1119 | 4.08 | 1.05 |       |         |                        |

45

<sup>1</sup> Data of people with no accessible outdoor spaces was not considered in the ANOVA, as they did not answer the question on the self-reported contribution of outdoor spaces.

**Table B.6. Linear regressions of the perceived contribution of views and accessible outdoor spaces as a function of accessible outdoor spaces and views.** Dependent variable was built with responses to the Likert-scale questions (from 1 – few to 5- high). Type of accessible outdoor spaces: balcony=reference, other private spaces, shared/public spaces; Type of views: few/urban=reference, mixed, natural. Notes: ^1119 responses were removed (i.e. individuals with no accessible outdoor spaces) because they did not respond to the Likert-scale question.

|                                       | Effect of accessible outdoor spaces |            |         |          | Effect of views |            |         |          |
|---------------------------------------|-------------------------------------|------------|---------|----------|-----------------|------------|---------|----------|
|                                       | Estimate                            | Std. Error | t value | Pr(> t ) | Estimate        | Std. Error | t value | Pr(> t ) |
| <b>UNADJUSTED MODELS</b>              |                                     |            |         |          |                 |            |         |          |
| (Intercept)                           | 4.15                                | 0.03       | 147.07  | <0.001   | 2.98            | 0.03       | 114.22  | <0.001   |
| <b>Views</b>                          |                                     |            |         |          |                 |            |         |          |
| Mixed                                 |                                     |            |         |          | 1.12            | 0.04       | 25.86   | <0.001   |
| Nature                                |                                     |            |         |          | 1.69            | 0.07       | 25.50   | <0.001   |
| <b>Accessible outdoor areas</b>       |                                     |            |         |          |                 |            |         |          |
| Garden/patio                          | 0.35                                | 0.05       | 7.21    | <0.001   |                 |            |         |          |
| Shared or public                      | 0.12                                | 0.06       | 1.92    | 0.055    |                 |            |         |          |
| Observations                          | 2,284^                              |            |         |          | 3,403           |            |         |          |
| R <sup>2</sup>                        | 0.021                               |            |         |          | 0.238           |            |         |          |
| <b>ADJUSTED MODELS</b>                |                                     |            |         |          |                 |            |         |          |
| (Intercept)                           | 2.83                                | 0.14       | 19.80   | <0.001   | 1.51            | 0.13       | 11.38   | <0.001   |
| <b>Views</b>                          |                                     |            |         |          |                 |            |         |          |
| Mixed                                 |                                     |            |         |          | 1.08            | 0.04       | 25.34   | <0.001   |
| Nature                                |                                     |            |         |          | 1.60            | 0.07       | 24.13   | <0.001   |
| <b>Accessible outdoor areas</b>       |                                     |            |         |          |                 |            |         |          |
| Garden/patio                          | 0.31                                | 0.05       | 6.35    | <0.001   |                 |            |         |          |
| Shared or public                      | 0.09                                | 0.06       | 1.48    | 0.139    |                 |            |         |          |
| <b>House Space (Rooms/person)</b>     |                                     |            |         |          |                 |            |         |          |
| (numeric)                             | 0.10                                | 0.03       | 3.26    | 0.001    | 0.12            | 0.03       | 4.17    | <0.001   |
| <b>Gender</b>                         |                                     |            |         |          |                 |            |         |          |
| Male                                  | -0.25                               | 0.04       | -5.77   | <0.001   | -0.20           | 0.04       | -4.79   | <0.001   |
| Other                                 | -0.17                               | 0.20       | -0.82   | 0.413    | 0.02            | 0.18       | 0.08    | 0.934    |
| <b>Age</b>                            |                                     |            |         |          |                 |            |         |          |
| 26-35                                 | 0.19                                | 0.08       | 2.36    | 0.018    | 0.18            | 0.07       | 2.46    | 0.014    |
| 36-45                                 | 0.36                                | 0.08       | 4.65    | <0.001   | 0.34            | 0.07       | 4.81    | <0.001   |
| 46-55                                 | 0.23                                | 0.08       | 3.09    | 0.002    | 0.44            | 0.07       | 6.32    | <0.001   |
| 56-65                                 | 0.01                                | 0.08       | 0.13    | 0.895    | 0.47            | 0.08       | 6.21    | <0.001   |
| >65                                   | -0.02                               | 0.11       | -0.19   | 0.848    | 0.58            | 0.10       | 5.63    | <0.001   |
| <b>Education level</b>                |                                     |            |         |          |                 |            |         |          |
| Prof. Educ. / University degree       | 0.30                                | 0.07       | 4.01    | <0.001   | 0.12            | 0.07       | 1.70    | 0.089    |
| Higher (Master, PhD)                  | 0.34                                | 0.08       | 4.24    | <0.001   | 0.18            | 0.07       | 2.39    | 0.017    |
| <b>Income (rank)</b>                  |                                     |            |         |          |                 |            |         |          |
| income/GDP per capita >2              | 0.05                                | 0.08       | 0.66    | 0.506    | 0.14            | 0.08       | 1.74    | 0.082    |
| no data                               | 0.02                                | 0.04       | 0.37    | 0.710    | 0.03            | 0.04       | 0.62    | 0.537    |
| <b>Change employment</b>              |                                     |            |         |          |                 |            |         |          |
| Yes                                   | 0.00                                | 0.08       | -0.03   | 0.979    | -0.09           | 0.07       | -1.31   | 0.190    |
| <b>Brief Resilience Coping Scale</b>  |                                     |            |         |          |                 |            |         |          |
| (numeric)                             | 0.05                                | 0.01       | 6.60    | <0.001   | 0.06            | 0.01       | 8.76    | <0.001   |
| <b>Lockdown with kids</b>             |                                     |            |         |          |                 |            |         |          |
| Yes                                   | 0.11                                | 0.05       | 2.17    | 0.030    | 0.07            | 0.05       | 1.49    | 0.135    |
| <b>Lockdown alone</b>                 |                                     |            |         |          |                 |            |         |          |
| Yes                                   | -0.26                               | 0.09       | -3.09   | 0.002    | -0.23           | 0.07       | -3.04   | 0.002    |
| <b>People with Special Care Needs</b> |                                     |            |         |          |                 |            |         |          |
| Yes                                   | -0.11                               | 0.07       | -1.65   | 0.099    | -0.07           | 0.06       | -1.03   | 0.305    |
| <b>Pet needs walking</b>              |                                     |            |         |          |                 |            |         |          |
| Yes                                   | 0.06                                | 0.05       | 1.13    | 0.260    | -0.02           | 0.05       | -0.44   | 0.663    |
| Observations                          | 2,284^                              |            |         |          | 3,403           |            |         |          |
| R <sup>2</sup>                        | 0.092                               |            |         |          | 0.285           |            |         |          |

**Table B.7.** Top 15 of emotions mentioned to describe a) respondent's mood during lockdown and b) respondent's character before lockdown. Respondents could choose between 1 and 3 words to describe each of the situation. The subsample of people in Spain under lockdown level 1 (3,403 obs.) was used. Colors represent the core-emotion in which the word is classified (Yellow=Happy, Blue=Sad, Grey=Disgusted, Red=Angry, Orange=Fearful, Green=Sad, Purple=Surprised).

| Position | During lockdown |      | Before lockdown |       |
|----------|-----------------|------|-----------------|-------|
|          | word            | freq | word            | freq  |
| 1        | bored           | 559  | optimistic      | 1,177 |
| 2        | optimistic      | 538  | joyful          | 1,102 |
| 3        | tired           | 427  | content         | 692   |
| 4        | stressed        | 388  | happy           | 510   |
| 5        | anxious         | 387  | interested      | 504   |
| 6        | accepted        | 386  | peaceful        | 401   |
| 7        | frustrated      | 333  | stressed        | 391   |
| 8        | vulnerable      | 265  | busy            | 373   |
| 9        | insecure        | 248  | trusting        | 321   |
| 10       | peaceful        | 249  | excited         | 185   |
| 11       | confused        | 237  | critical        | 168   |
| 12       | scared          | 236  | accepted        | 166   |
| 13       | sad             | 210  | tired           | 155   |
| 14       | bad             | 195  | anxious         | 115   |
| 15       | happy           | 194  | insecure        | 110   |
